# Supplementary material
Source: PubMed Central journal article supplement (PMC7960139)
Supplement: 15-00700.pdf [file 15-00700.pdf]

**On-line Table: Predicted SCDs from our formula and other published formulas and the actual SCDs**

| Age (yr)/Sex | BMI   | Angle | Predicted Distance (inches) | Actual Distance (inches) | % Δ  | Level | Abe, et al <sup>10</sup> (17 × weight/height + 1) <sup>a</sup> | % Δ | Ma, et al <sup>11</sup> (Male: 1.27 + .18 × BMI, Female: 1.68 + 0.067 × kg) <sup>a</sup> | % Δ | Stocker and Bonsu <sup>12</sup> (0.5 × weight [kg] + 18) <sup>b</sup> | % Δ | Chong, et al <sup>13</sup> (10 × weight/height + 1) <sup>a</sup> | % Δ |
|--------------|-------|-------|-----------------------------|--------------------------|------|-------|----------------------------------------------------------------|-----|------------------------------------------------------------------------------------------|-----|-----------------------------------------------------------------------|-----|------------------------------------------------------------------|-----|
| 28/M         | 35.93 | 5     | 3.7                         | 3.39                     | 9    | L2-L3 | 4.8                                                            | 42  | 3.04                                                                                     | 10  | 3.07                                                                  | 9   | 2.99                                                             | 12  |
| 19/M         | 31.8  | 6     | 3.38                        | 3.22                     | 5    | L3-L4 | 4.06                                                           | 26  | 3.17                                                                                     | 2   | 2.58                                                                  | 20  | 2.56                                                             | 20  |
| 53/M         | 30.83 | 6     | 3.31                        | 3.46                     | 4    | L3-L4 | 4.26                                                           | 23  | 2.69                                                                                     | 22  | 2.85                                                                  | 18  | 2.67                                                             | 23  |
| 43/F         | 29.52 | 7     | 3.2                         | 3.31                     | 3    | L3-L4 | 3.9                                                            | 18  | 3.06                                                                                     | 8   | 2.5                                                                   | 24  | 2.43                                                             | 27  |
| 26/M         | 34.96 | 7     | 3.63                        | 3.22                     | 13   | L3-L4 | 4.2                                                            | 30  | 2.97                                                                                     | 8   | 2.65                                                                  | 22  | 2.63                                                             | 18  |
| 46/M         | 32.05 | -     | 3.4                         | 3.22                     | 6    | L3-L4 | 4.15                                                           | 29  | 2.77                                                                                     | 14  | 2.59                                                                  | 18  | 2.59                                                             | 20  |
| 25/M         | 29.43 | 3     | 3.2                         | 3.2                      | 0    | L3-L4 | 3.85                                                           | 20  | 2.56                                                                                     | 20  | 2.5                                                                   | 22  | 2.4                                                              | 25  |
| 54/F         | 43.23 | 0     | 4.3                         | 5                        | 14   | L2-L3 | 5.11                                                           | 2   | 3.67                                                                                     | 27  | 2.95                                                                  | 41  | 3.2                                                              | 36  |
| 68/M         | 23.78 | 7     | 2.74                        | 2.99                     | 8    | L2-L3 | 3.23                                                           | 8   | 2.17                                                                                     | 27  | 1.8                                                                   | 40  | 2.1                                                              | 30  |
| 68/M         | 25.6  | -     | 2.89                        | 3.1                      | 7    | L2-L3 | 3.46                                                           | 12  | 2.31                                                                                     | 25  | 2.34                                                                  | 21  | 2.2                                                              | 29  |
| 64/F         | 17.08 | 12    | 2.21                        | 2.76                     | 20   | L2-L3 | 2.27                                                           | 18  | 1.89                                                                                     | 32  | 1.6                                                                   | 42  | 1.5                                                              | 46  |
| 73/M         | 21.57 | 15    | 2.57                        | 2.56                     | 0.4  | L2-L3 | 2.9                                                            | 13  | 2.02                                                                                     | 21  | 1.97                                                                  | 23  | 1.85                                                             | 28  |
| 49/M         | 31.55 | 13    | 3.36                        | 3.07                     | 9    | L2-L3 | 3.92                                                           | 28  | 2.73                                                                                     | 11  | 2.45                                                                  | 20  | 2.47                                                             | 20  |
| 57/F         | 19.36 | 15    | 2.39                        | 2.83                     | 15.5 | L3-L4 | 2.52                                                           | 11  | 2                                                                                        | 29  | 1.74                                                                  | 39  | 1.65                                                             | 42  |
| 48/M         | 32.94 | 0     | 3.48                        | 3.15                     | 10   | L3-L4 | 3.93                                                           | 25  | 2.83                                                                                     | 10  | 2.53                                                                  | 20  | 2.56                                                             | 19  |
| 73/M         | 21.57 | 15    | 2.57                        | 2.6                      | 3    | L3-L4 | 2.9                                                            | 12  | 2.02                                                                                     | 22  | 1.97                                                                  | 24  | 1.85                                                             | 29  |
| 43/F         | 33.7  | 0     | 3.53                        | 3.23                     | 9    | L3-L4 | 4.17                                                           | 29  | 3.17                                                                                     | 2   | 2.56                                                                  | 21  | 2.61                                                             | 19  |
| 41/M         | 43.77 | 12    | 4.34                        | 3.8                      | 14   | L2-L3 | 5.23                                                           | 38  | 3.6                                                                                      | 5   | 3.08                                                                  | 27  | 3.24                                                             | 15  |
| 39/M         | 32.07 | 2     | 3.41                        | 3.39                     | 1    | L3-L4 | 3.98                                                           | 17  | 2.77                                                                                     | 18  | 2.48                                                                  | 19  | 2.5                                                              | 26  |
| 49/M         | 31.81 | 10    | 3.38                        | 3.31                     | 2    | L2-L3 | 3.95                                                           | 19  | 2.75                                                                                     | 17  | 2.47                                                                  | 25  | 2.49                                                             | 25  |
| 59/F         | 29.07 | 9     | 3.17                        | 3.43                     | 8    | L2-L3 | 3.65                                                           | 6   | 2.8                                                                                      | 18  | 2.31                                                                  | 33  | 2.47                                                             | 33  |
| 30/M         | 29.32 | 3     | 3.19                        | 3.31                     | 4    | L2-L3 | 3.93                                                           | 19  | 2.58                                                                                     | 22  | 2.58                                                                  | 22  | 2.47                                                             | 25  |
| 68/M         | 24.64 | 16    | 2.81                        | 3.07                     | 8    | L2-L3 | 3.32                                                           | 8   | 2.24                                                                                     | 27  | 2.24                                                                  | 27  | 2.11                                                             | 31  |
| 25/F         | 27.17 | 6     | 3.01                        | 3.23                     | 7    | L3-L4 | 3.24                                                           | 0   | 2.44                                                                                     | 24  | 2.05                                                                  | 37  | 2.07                                                             | 36  |
| 57/M         | 22.24 | 8     | 2.59                        | 2.76                     | 6    | L3-L4 | 2.93                                                           | 6   | 2.07                                                                                     | 25  | 1.97                                                                  | 29  | 1.89                                                             | 32  |
| 36/M         | 46.98 | 12    | 4.5                         | 4.72                     | 5    | L3-L4 | 5.75                                                           | 22  | 3.82                                                                                     | 19  | 3.34                                                                  | 29  | 3.54                                                             | 25  |
| 67/F         | 31.86 | 10    | 3.33                        | 3.5                      | 5    | L3-L4 | 3.85                                                           | 10  | 2.88                                                                                     | 18  | 2.34                                                                  | 33  | 2.44                                                             | 30  |
| 23/M         | 24.95 | 15    | 2.8                         | 2.56                     | 9    | L4-L5 | 3.45                                                           | 35  | 2.27                                                                                     | 11  | 2.35                                                                  | 8   | 2.19                                                             | 14  |
| 24/F         | 44.35 | 8     | 4.3                         | 4.06                     | 6    | L2-L3 | 5.67                                                           | 40  | 4.37                                                                                     | 7   | 3.47                                                                  | 15  | 3.5                                                              | 14  |
| 26/M         | 34.9  | 9     | 3.57                        | 3.5                      | 2    | L4-L5 | 4.19                                                           | 20  | 2.97                                                                                     | 15  | 2.53                                                                  | 18  | 2.62                                                             | 11  |
| 66/M         | 40.17 | 0     | 3.97                        | 3.5                      | 14   | L3-L4 | 5.45                                                           | 56  | 3.35                                                                                     | 4   | 3.5                                                                   | 0   | 3.37                                                             | 4   |
| 23/M         | 22.69 | 12    | 2.63                        | 2.76                     | 5    | L4-L5 | 3.17                                                           | 15  | 2.1                                                                                      | 24  | 2.2                                                                   | 20  | 2.03                                                             | 26  |
| 43/F         | 48.58 | 9     | 4.62                        | 3.86                     | 20   | L3-L4 | 5.96                                                           | 54  | 4.43                                                                                     | 15  | 3.52                                                                  | 9   | 3.66                                                             | 5   |
| 45/F         | 39.06 | 9     | 3.89                        | 3.35                     | 16   | L2-L3 | 4.39                                                           | 31  | 3.06                                                                                     | 9   | 2.5                                                                   | 25  | 2.74                                                             | 18  |
| 38/M         | 33.21 | 1     | 3.44                        | 3.5                      | 2    | L3-L4 | 4.29                                                           | 23  | 2.85                                                                                     | 19  | 2.72                                                                  | 22  | 2.69                                                             | 23  |
| 47/M         | 25.09 | 7     | 2.81                        | 2.95                     | 5    | L4-L5 | 3.34                                                           | 13  | 2.28                                                                                     | 23  | 2.23                                                                  | 24  | 2.13                                                             | 28  |
| 29/M         | 35.36 | 15    | 3.6                         | 3.5                      | 3    | L2-L3 | 4.72                                                           | 35  | 3                                                                                        | 14  | 3                                                                     | 14  | 2.93                                                             | 16  |
| 68/M         | 32.54 | 15    | 3.39                        | 3.5                      | 3    | L2-L3 | 4.37                                                           | 25  | 2.81                                                                                     | 20  | 2.85                                                                  | 20  | 2.74                                                             | 22  |
| 31/F         | 40.61 | 10    | 4                           | 5                        | 20   | L3-L4 | 5.22                                                           | 4   | 4.05                                                                                     | 19  | 3.24                                                                  | 35  | 3.23                                                             | 35  |
| 69/M         | 22.51 | 12    | 2.56                        | 2.61                     | 2    | L4-L5 | 3                                                              | 15  | 2.09                                                                                     | 20  | 2.3                                                                   | 12  | 1.92                                                             | 26  |
| 65/F         | 27.2  | 10    | 3                           | 3.5                      | 14   | L4-L5 | 3.34                                                           | 5   | 2.6                                                                                      | 26  | 2.15                                                                  | 39  | 2.15                                                             | 39  |
| 27/M         | 17.68 | 5     | 2.24                        | 2.4                      | 7    | L4-L5 | 2.53                                                           | 5   | 1.75                                                                                     | 27  | 1.84                                                                  | 23  | 1.65                                                             | 31  |
| 61/M         | 35.63 | 15    | 3.62                        | 5                        | 28   | L3-L4 | 4.83                                                           | 3   | 3                                                                                        | 40  | 3.12                                                                  | 38  | 3                                                                | 40  |
| 55/F         | 28.29 | -     | 3.06                        | 3.15                     | 3    | L3-L4 | 3.66                                                           | 16  | 2.89                                                                                     | 8   | 2.36                                                                  | 25  | 2.31                                                             | 27  |
| 70/F         | 30.11 | 8     | 3.2                         | 3.46                     | 8    | L4-L5 | 3.64                                                           | 5   | 2.72                                                                                     | 21  | 2.24                                                                  | 35  | 2.3                                                              | 34  |

**Note:**—Δ indicates the difference between the predicted lengths by formulas and the actual distance; —, oblique angles were not recorded.

<sup>a</sup> Formula results are in centimeters. Columns are centimeters converted to inches.

<sup>b</sup> Formula results are in millimeters. Columns are millimeters converted to inches.
